# Supplementary material for: Benefit from B-Lymphocyte Depletion Using the Anti-CD20 Antibody Rituximab in Chronic Fatigue Syndrome. A Double-Blind and Placebo-Controlled Study
Source: PubMed Central journal article supplement (PMC3198463; doi:10.1371/journal.pone.0026358), 2011-10-19
Supplement: pone.0026358.s006.pdf [file pone.0026358.s006.pdf]

**Table S1.** Primers and probes for detection of Xenotropic murine leukemia virus-related virus (XMRV) and MLV-related virus.

| Primer (F/R/P) <sup>1</sup>                                  | Sequence (5' - 3')                                                                                     | Location <sup>2</sup>                                                            | Method, Template                                    | Refs. <sup>6</sup>   |
|--------------------------------------------------------------|--------------------------------------------------------------------------------------------------------|----------------------------------------------------------------------------------|-----------------------------------------------------|----------------------|
| XMRV4552F (F)<br>XMRV4572MGB (P)<br>XMRV4653R (R)            | CGAGAGGCAGCCATGAAGG<br>6FAM-AGTTCTAGAAACCTCTACACTC-MGBNFQ<br>GAGATCTGTTTCGGTGTAAATGGAAA                | 4547-4565<br>4567-4588<br>4624-4648                                              | qPCR<br>gDNA, cDNA<br>viral amp. <sup>4</sup>       | Schlaberg            |
| XMRV4552F (F)<br>XMRV4572MGB (P)<br>XMRV4673R (R)            | CGAGAGGCAGCCATGAAGG<br>6FAM-AGTTCTAGAAACCTCTACACTC-MGBNFQ<br>CCCAGTCCCGTAGTCTTTTGAG                    | 4547-4565<br>4567-4588<br>4646-4668                                              | qPCR<br>gDNA, cDNA<br>viral amp. <sup>4</sup>       | Schlaberg            |
| XMRV_F36 (F)<br>XMRV04-P (P)<br>XMRV_B42 (R)                 | CCCAAATCCTGGACCCCTAAG<br>6FAM-GTATCGCTGGACCACGGA-BHQ1<br>CATACTCTGAAGGCAACCTCTACC                      | 2325-2346<br>2389-2406<br>2725-2749                                              | qPCR<br>gDNA, cDNA                                  | in house             |
| XMRV_04F (F)<br>XMRV_04P (P)<br>XMRV_04R (R)                 | CTAAGTGACAAGTCTGCC<br>6FAM-GTATCGCTGGACCACGGA-BHQ1<br>CGCAAAGTACATCTGGCT                               | 2342-2359<br>2389-2406<br>2408-2425                                              | qPCR<br>gDNA, cDNA<br>viral amp. <sup>4</sup>       | in house             |
| gag 419F (F)<br>gag 1154R (R)                                | ATCAGTTAACCTACCCGAGTCGGAC<br>GCCGCCTCTTCTTCATTGTTCTC                                                   | 419-443<br>1127-1149                                                             | PCR<br>gDNA                                         | Lombardi             |
| env 5922F (F)<br>env 6273R (R)                               | GCTAATGTACCTCCCTCTGG<br>GGAGCCCACTGAGGAATCAAAACAGG                                                     | 5917-5938<br>6242-6267                                                           | PCR<br>gDNA                                         | Lombardi             |
| gag 419F (F)<br>gag 1154R (R)<br>GAG-I-F (F)<br>GAG-I-R (R)  | ATCAGTTAACCTACCCGAGTCGGAC<br>GCCGCCTCTTCTTCATTGTTCTC<br>TCTCGAGATCATGGGACAGA<br>AGAGGGTAAGGGCAGGGTAA   | 419-443<br>1127-1149<br>598-617<br>991-1012                                      | Nested PCR<br>gDNA                                  | Lombardi<br>Urisman  |
| 419F (F)<br>1154R (R)<br>NP116F (F)<br>NP117R (R)            | ATCAGTTAACCTACCCGAGTCGGAC<br>GCCGCCTCTTCTTCATTGTTCTC<br>CATGGGACAGACCGTAACTACC<br>GCAGATCGGGACGGAGGTTG | 419-443<br>1127-1149<br>607-628<br>968-987                                       | Nested PCR<br>gDNA, cDNA<br>viral amp. <sup>4</sup> | Lombardi<br>Lo       |
| XMRV_F36 (F)<br>XMRV_B42 (R)<br>XMRV_04F (F)<br>XMRV_04R (R) | CCCAAATCCTGGACCCCTAAG<br>CATACTCTGAAGGCAACCTCTACC<br>CTAAGTGACAAGTCTGCC<br>CGCAAAGTACATCTGGCT          | 2325-2346<br>2725-2749<br>2342-2359<br>2408-2425                                 | Nested PCR<br>gDNA                                  | in house<br>in house |
| GAG-O-F (F)<br>GAG-O-R (R)<br>GAG-I-F (F)<br>GAG-I-R (R)     | CGCGTCTGATTTGTTTGT<br>CCGCCTCTTCTTCATTGTTCTC<br>TCTCGAGATCATGGGACAGA<br>AGAGGGTAAGGGCAGGGTAA           | 537-556<br>1129-1148<br>598-617<br>991-1012                                      | Nested PCR<br>gDNA, cDNA,                           | Urisman<br>Urisman   |
| PMP22ex3F (F)<br>PMP22ex3P (P)<br>PMP22Ex3R (R)              | GGGCAATGGACACGCAACT<br>6FAM-CTGGCAGAACTGTAGCACCTCTCC-BHQ1<br>TGATGAGAAACAGTGGTGGACA                    | 11146-11164 <sup>3</sup><br>11170-11194 <sup>3</sup><br>11203-11224 <sup>3</sup> | qPCR<br>gDNA                                        | in house             |

<sup>1</sup>: F; forward primer, R; reverse primer, P; taqman probe.

<sup>2</sup>: XMRV sequence according to GenBank accession number EF185282.

<sup>3</sup>: According to GenBank accession number NG\_007949.1. Peripheral myelin protein 22 (PMP22, a single copy gene) was used to normalize for PCR using gDNA as input.  $\beta$ -actin (assay ID Hs99999903\_m1) was used as internal control for RT-PCR.

<sup>4</sup>: Coculture of patient peripheral blood mononuclear cells with LNCaP prostate carcinoma cells for viral amplification prior to PCR, using the primer setups indicated and both gDNA and cDNA as templates. Performed for nine patients.

<sup>6</sup>: References

Schlaberg R, Choe DJ, Brown KR, Thaker HM, Singh IR: XMRV is present in malignant prostatic epithelium and is associated with prostate cancer, especially high-grade tumors. *Proc Natl Acad Sci U S A* 2009, 106(38):16351-16356.

Lombardi VC, Ruscetti FW, Das Gupta J, Pfof MA, Hagen KS, Peterson DL, Ruscetti SK, Bagni RK, Petrow-Sadowski C, Gold B, Dean M, Silverman RH, Mikovits JA: Detection of an Infectious Retrovirus, XMRV, in Blood Cells of Patients with Chronic Fatigue Syndrome. *Science* 2009, 326(5952):585-589.

Urisman A, Molinaro RJ, Fischer N, Plummer SJ, Casey G, Klein EA, Malathi K, Magi-Galluzzi C, Tubbs RR, Ganem D, Silverman RH, DeRisi JL: Identification of a novel Gammaretrovirus in prostate tumors of patients homozygous for R462Q RNASEL variant. *PLoS Pathog* 2006, 2(3):e25.

Lo SC, Pripuzova N, Li B, Komaroff AL, Hung GC, Wang R, Alter HJ: Detection of MLV related virus gene sequences in blood of patients with chronic fatigue syndrome and healthy blood donors. *Proc Natl Acad Sci U S A* 2010, 107(36):15874-15879.
